# Supplementary material
Source: MDPI journal article supplement (https://www.mdpi.com/1999-4907/13/6/947)
Supplement: s1 [file s1]

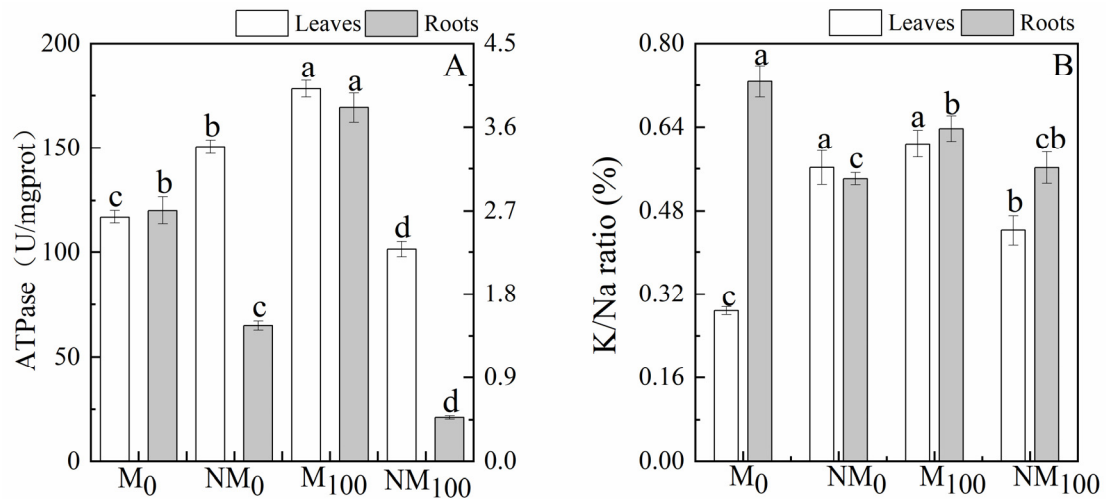

Figure S1 Activities of cytomembrane adenosine triphosphatase (ATPase, A) and ratios of K and Na (K/Na ratio) in tender leaves and fine roots irrigated with or without magnetized water and exposed to cadmium stress. Data in the table are the means  $\pm$  *SE* of at least three replicates. Different lowercase letters indicate significant differences among the four treatments at the 0.05 level in leaves and roots.

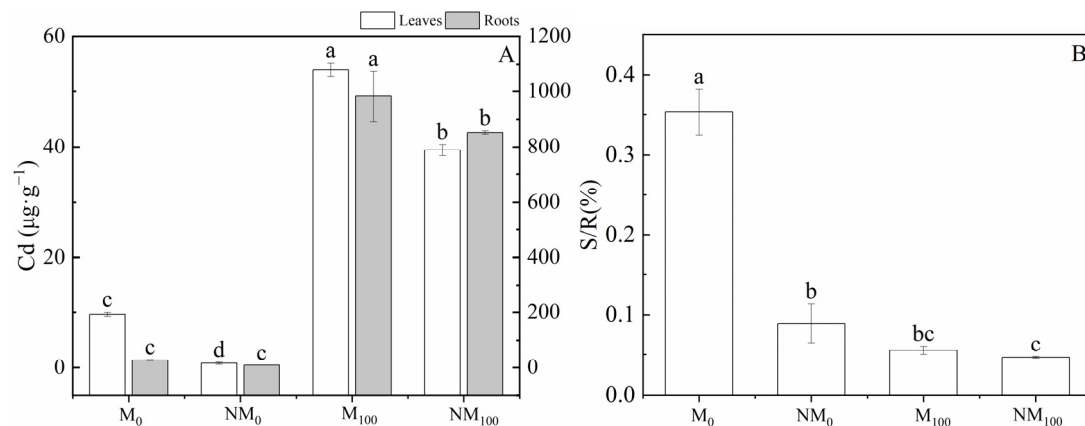

Figure S2 Changes in cadmium contents (Cd, A) in tender leaves and fine roots and the biological transfer coefficient of Cd from leaves to roots (S/R, B) of 'Neva' irrigated with or without magnetized water and exposed to cadmium stress. Data in the table are the means  $\pm$  *SE* of at least three replicates. Different lowercase letters indicate significant differences among the four treatments at the 0.05 level in leaves and roots.

Table S1 Changes in root morphological characteristics of ‘Neva’ irrigated with or without magnetized water and exposed to cadmium stress. Different lowercase letters indicate significant differences among the four treatments at the 0.05 level. Data in the table are the means  $\pm$  SD of at least three replicates.

| Treatments        | Length (cm)          | Surface Area<br>(cm <sup>2</sup> ) | Average<br>Diameter<br>(mm) | Root Volume<br>(cm <sup>3</sup> ) | Tips                 | Number of Short<br>Roots $\leq$ 1.5 cm |
|-------------------|----------------------|------------------------------------|-----------------------------|-----------------------------------|----------------------|----------------------------------------|
| M <sub>0</sub>    | 260.30 $\pm$ 18.23a  | 71.57 $\pm$ 5.47a                  | 0.90 $\pm$ 0.08a            | 1.71 $\pm$ 0.042a                 | 1794.83 $\pm$ 60.29a | 254.56 $\pm$ 17.44ab                   |
| NM <sub>0</sub>   | 152.85 $\pm$ 31.38b  | 36.29 $\pm$ 1.10b                  | 0.64 $\pm$ 0.18a            | 0.74 $\pm$ 0.038a                 | 948.67 $\pm$ 43.31c  | 154.41 $\pm$ 12.12c                    |
| M <sub>100</sub>  | 218.80 $\pm$ 25.30ab | 52.16 $\pm$ 15.89ab                | 0.68 $\pm$ 0.09a            | 0.94 $\pm$ 0.038a                 | 1463.17 $\pm$ 28.27b | 302.39 $\pm$ 20.42a                    |
| NM <sub>100</sub> | 155.37 $\pm$ 19.15b  | 38.58 $\pm$ 12.19ab                | 0.57 $\pm$ 0.05a            | 0.79 $\pm$ 0.031a                 | 790.00 $\pm$ 40.75c  | 217.57 $\pm$ 20.43b                    |
